# Supplementary material
Source: MDPI journal article supplement (https://www.mdpi.com/1424-8247/16/8/1132)
Supplement: s1 [file s1]

## Supplementary Materials

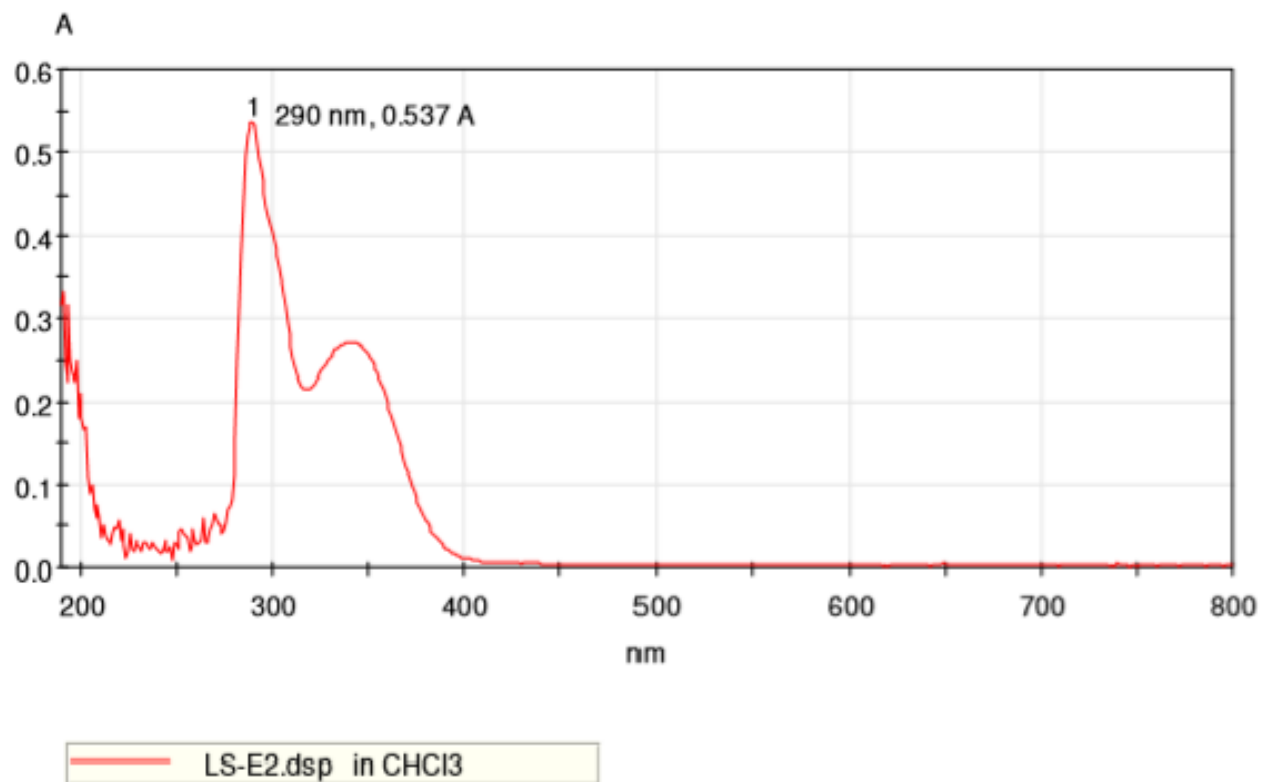

**Figure S1.** UV-Visible spectrum of interruptin A in chloroform

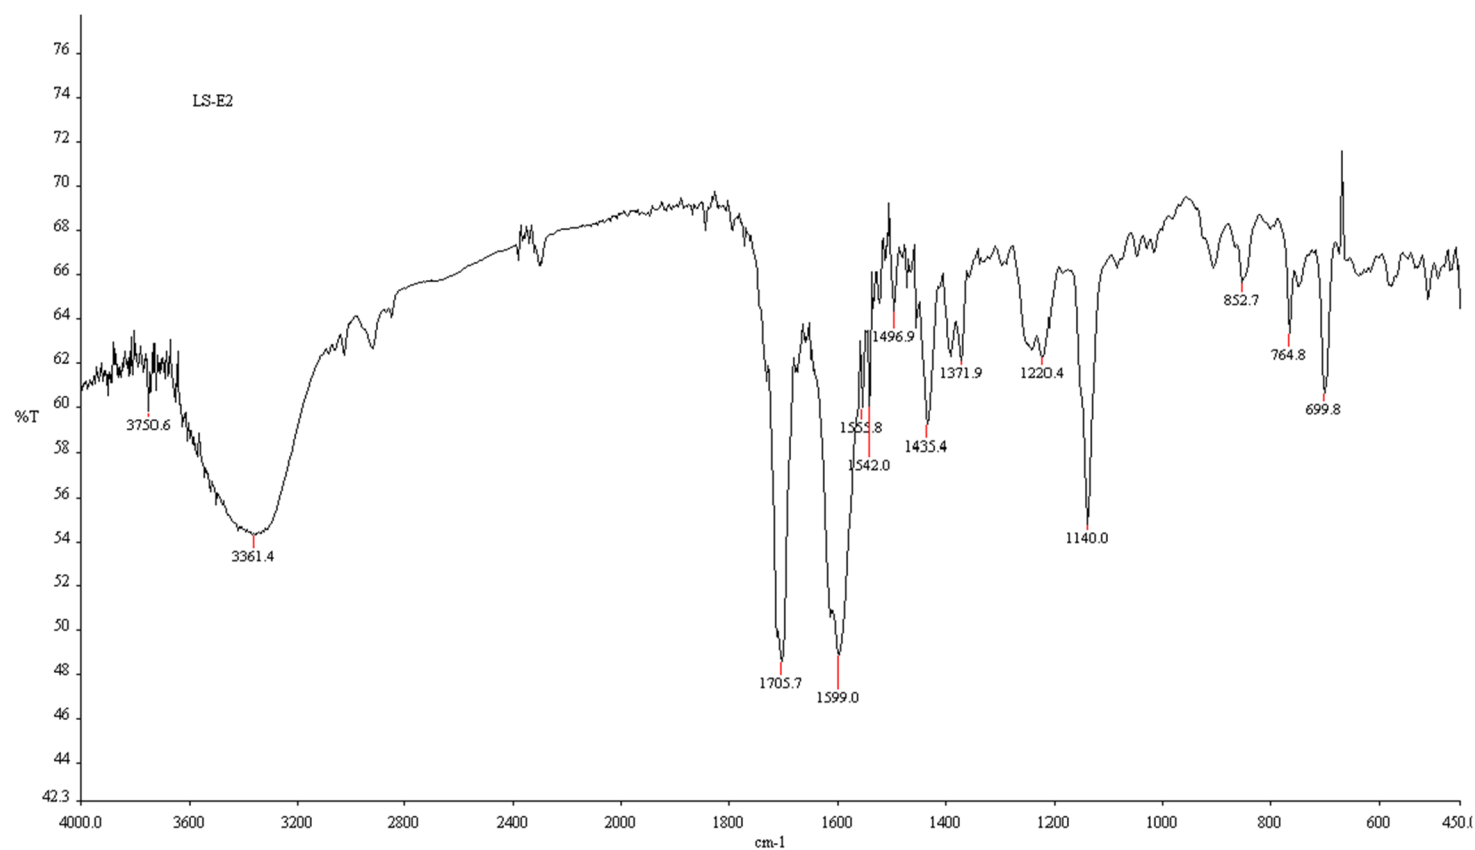

**Figure S2.** IR spectrum of interruptin A in KBr disc

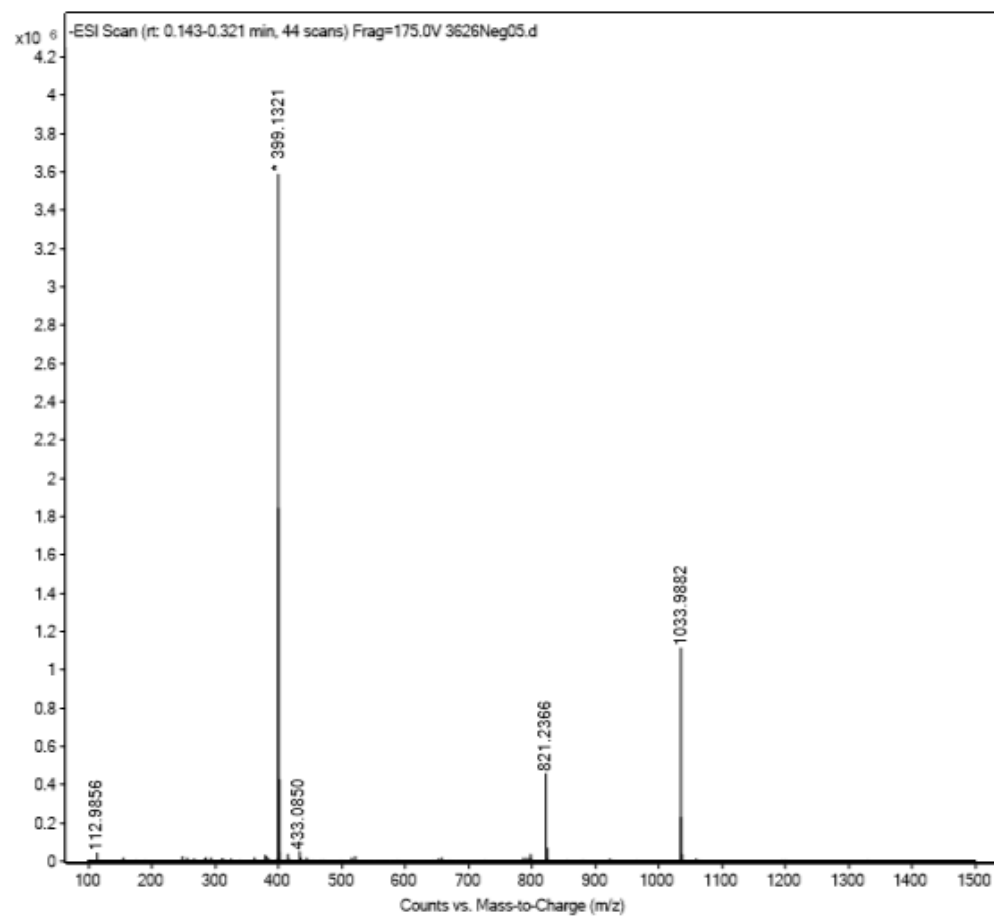

**Figure S3.** ESI-Mass spectrum from LC-MS/MS of interruptin A

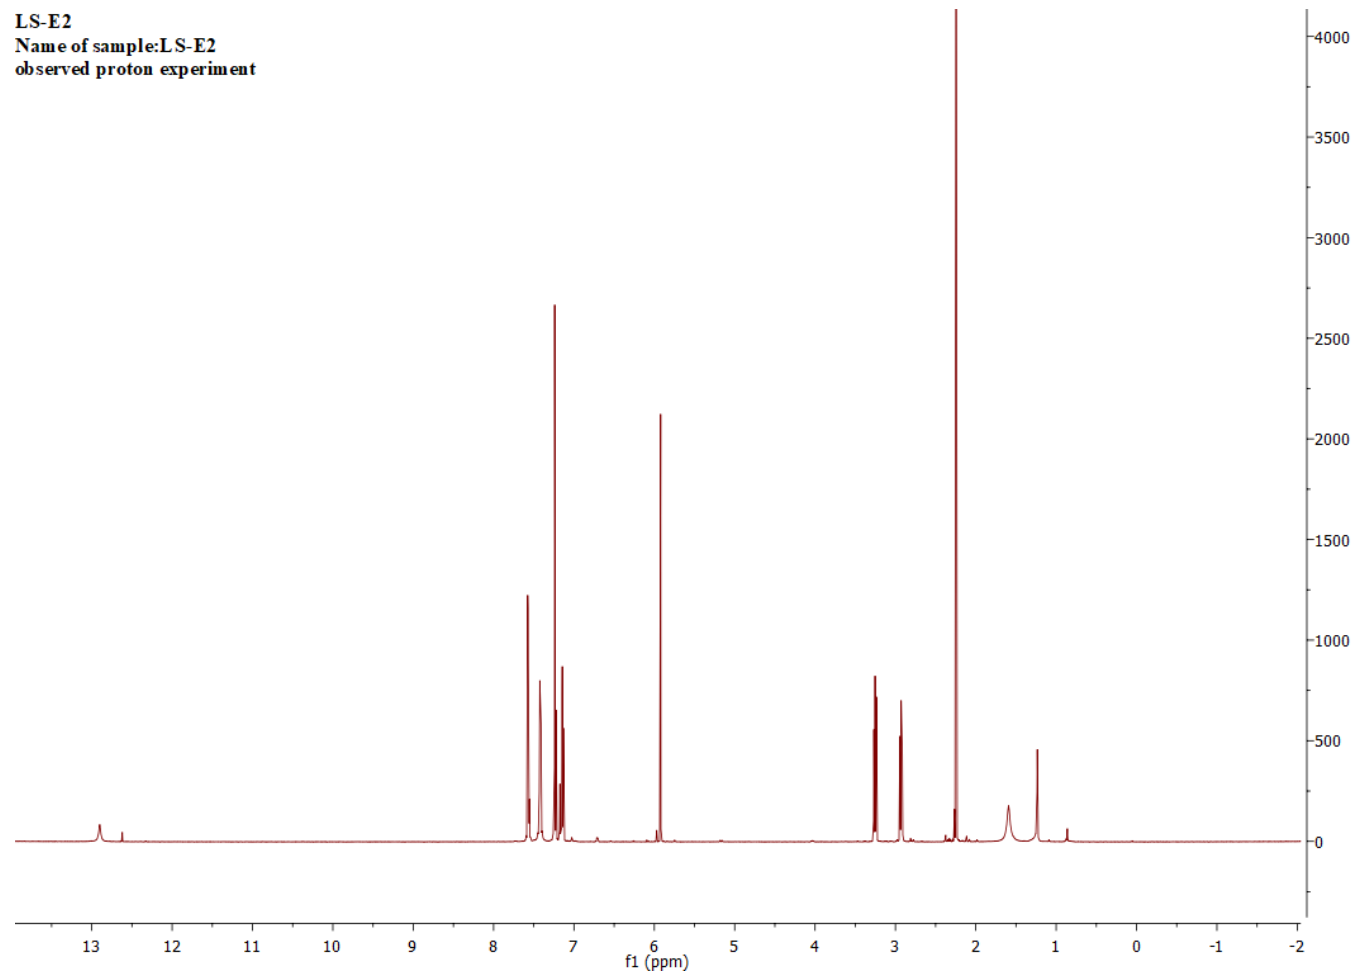

**Figure S4.**  $^1\text{H}$ -NMR of interruptin A (500 MHz in  $\text{CHCl}_3-d$ )

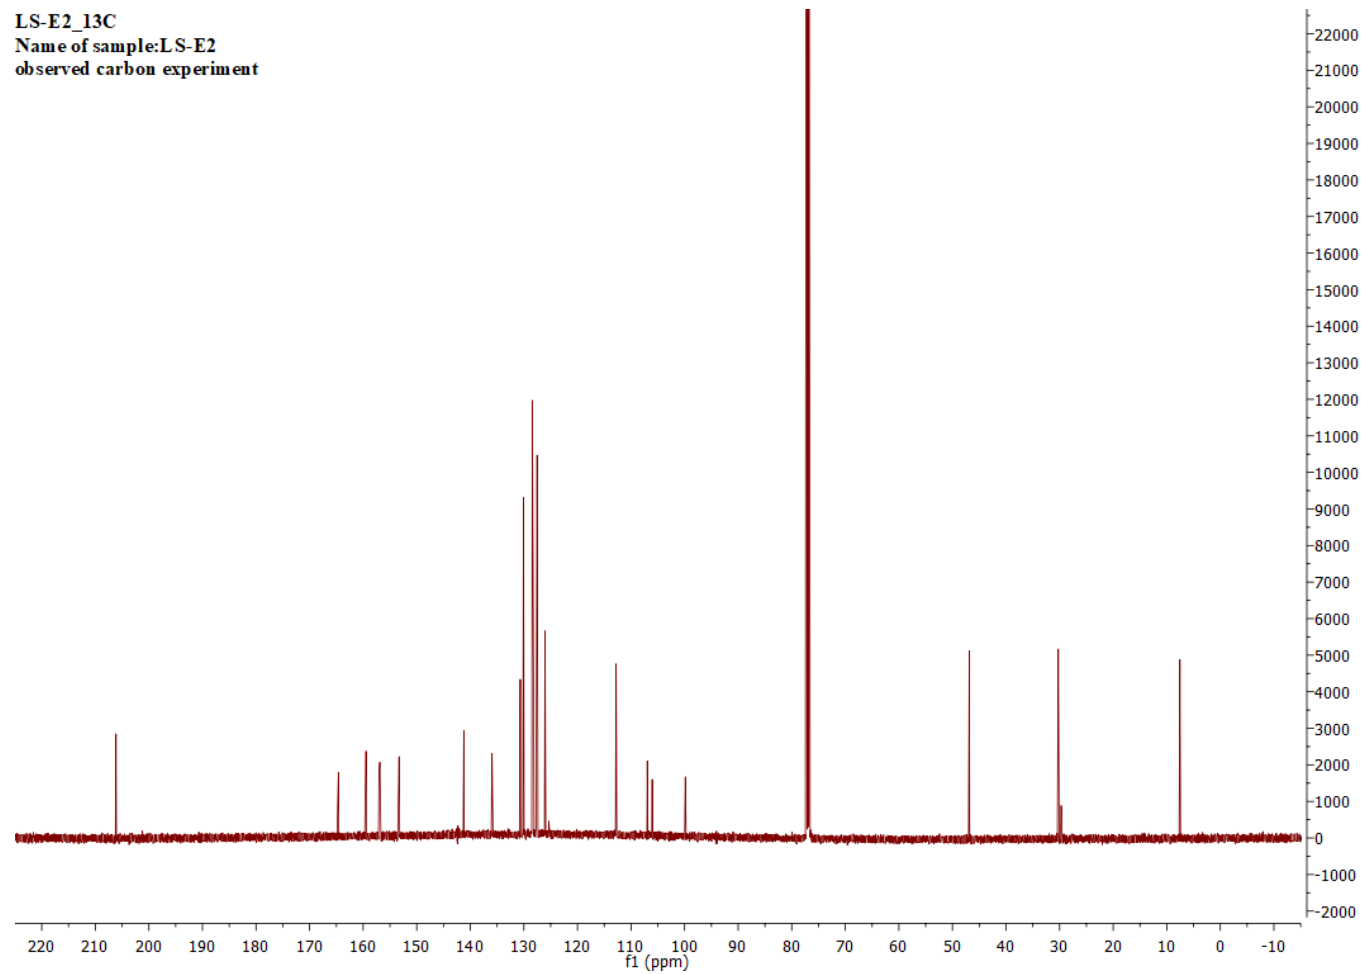

**Figure S5.**  $^{13}\text{C}$ -NMR of interruptin A (125 MHz in  $\text{CHCl}_3-d$ )

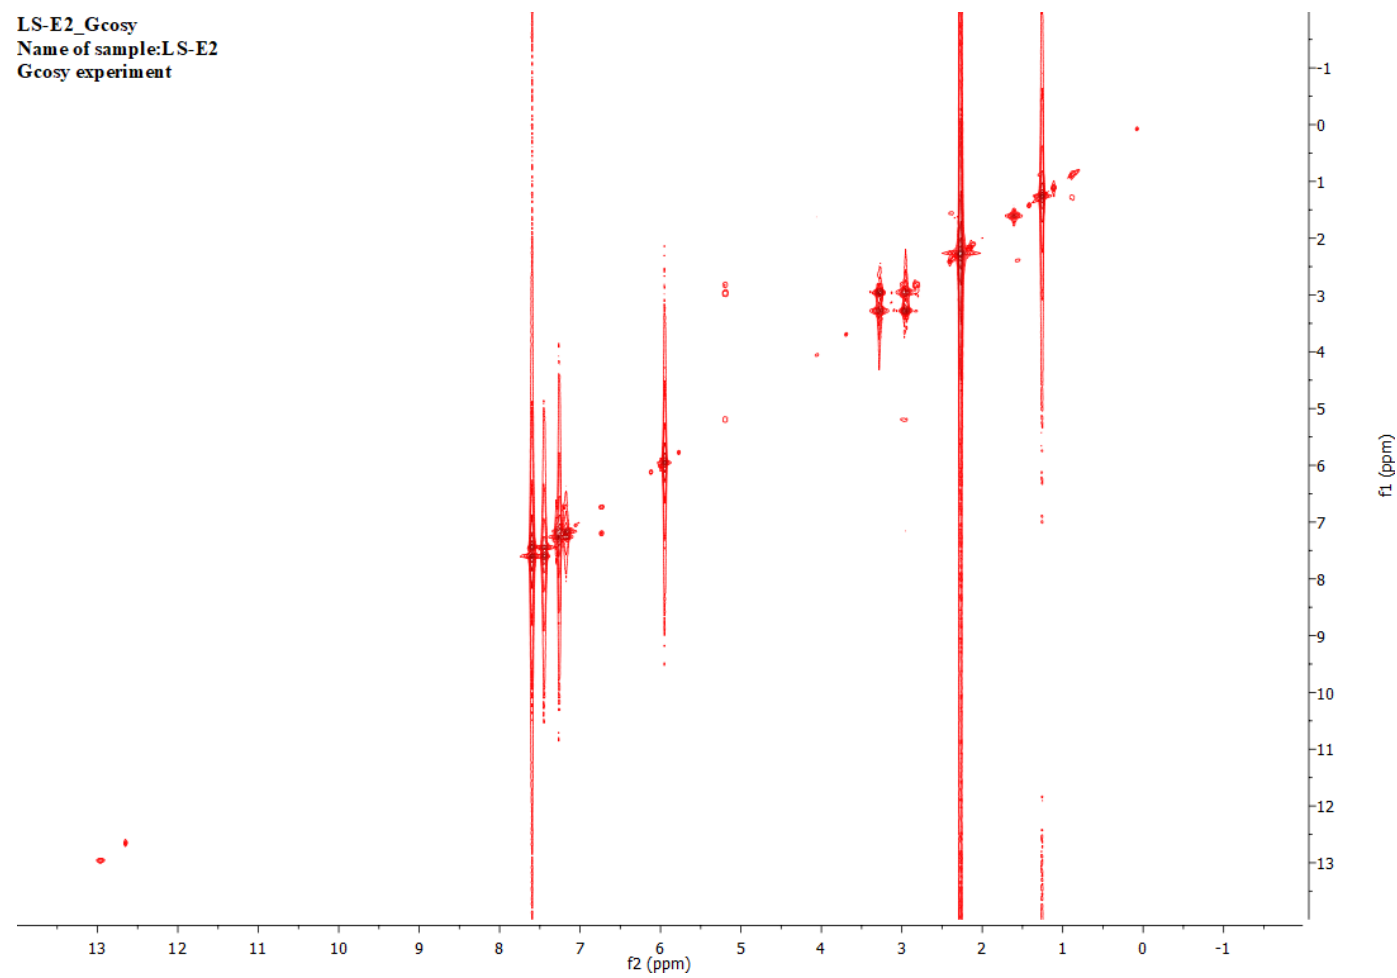

**Figure S6.**  $^1\text{H}$ - $^1\text{H}$  COSY of interruptin A

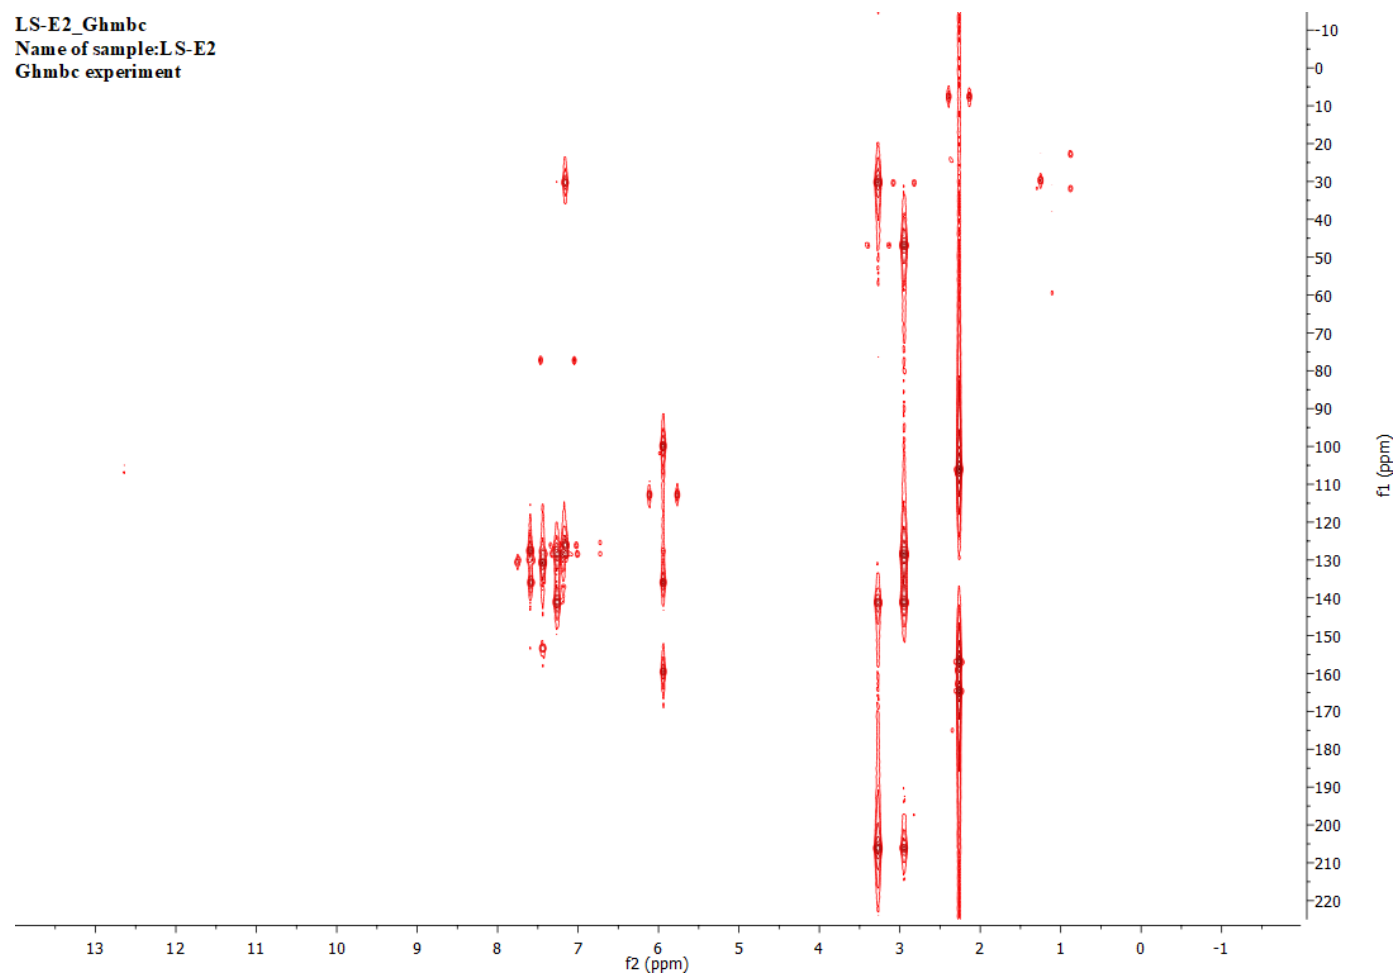

**Figure S7.** HMBC of interruptin A

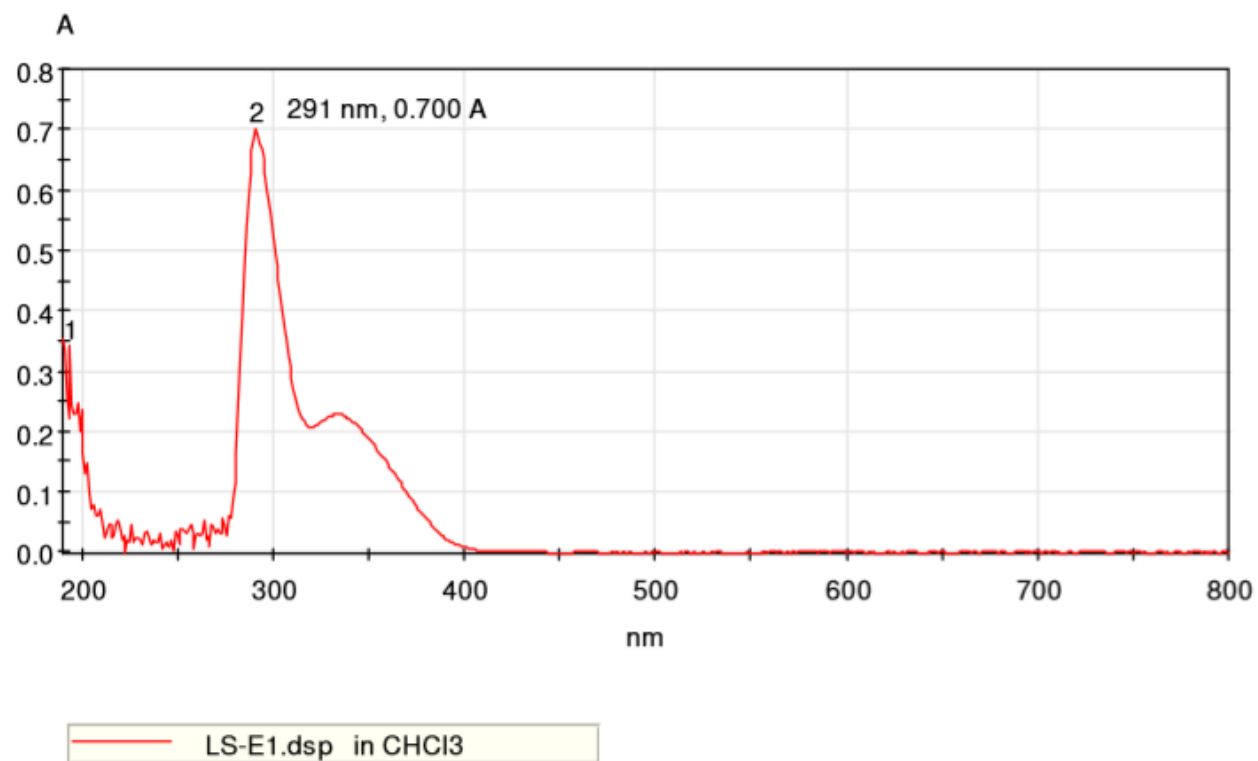

**Figure S8.** UV-Visible spectrum of interruptin C in chloroform



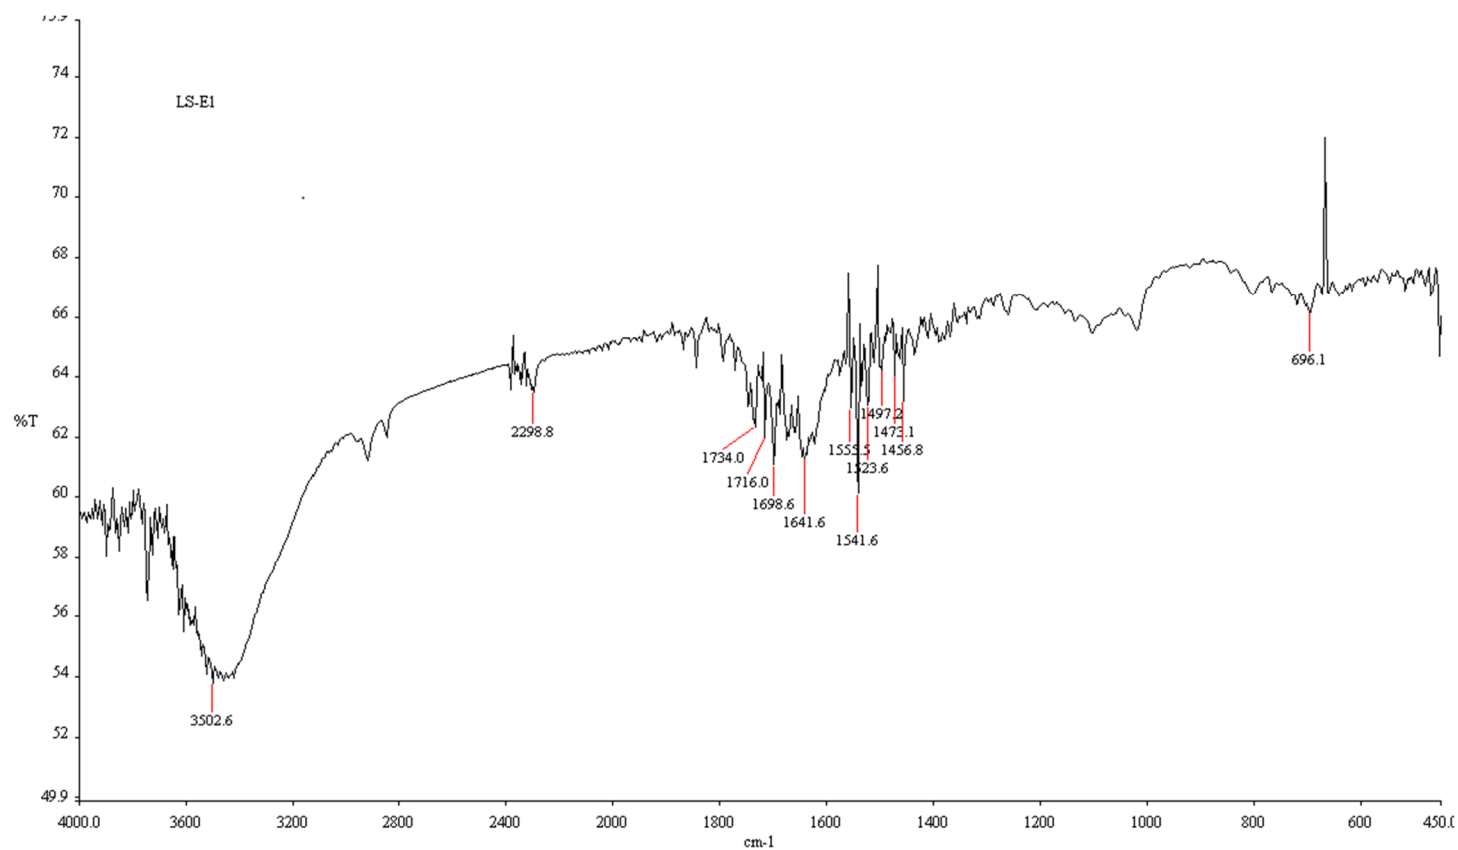

**Figure S9.** IR spectrum of interruptin C in KBr disc

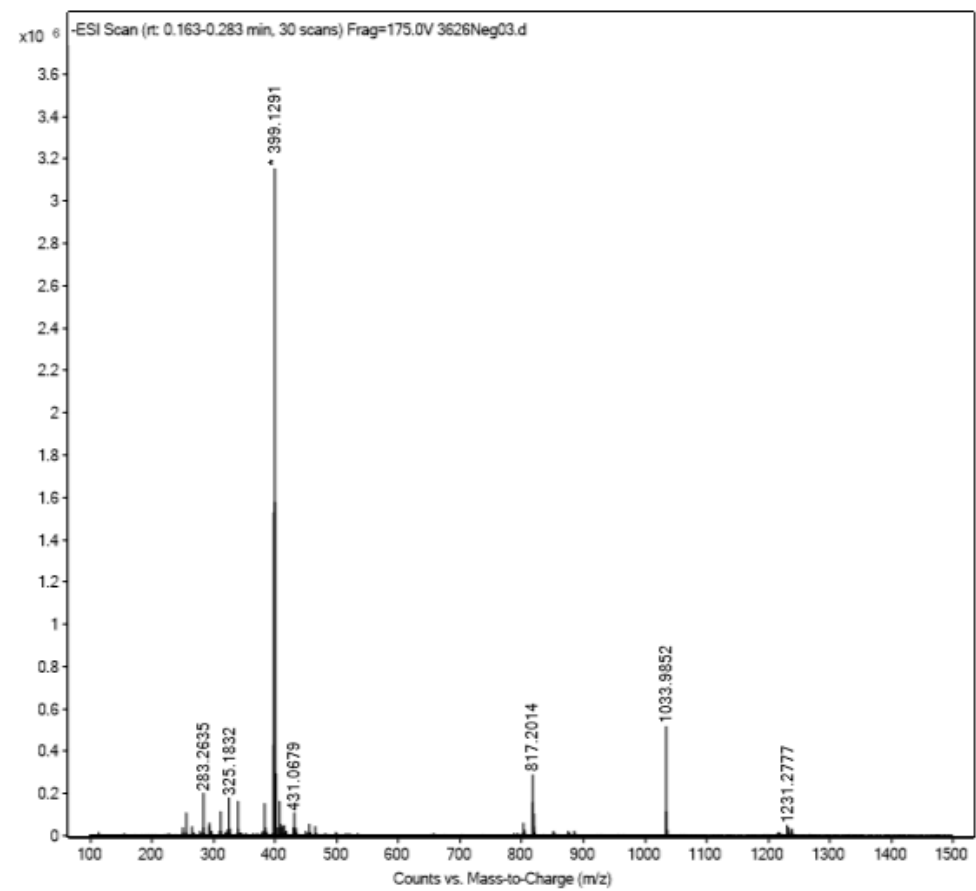

**Figure S10.** ESI-Mass spectrum from LC-MS/MS of interruptin C

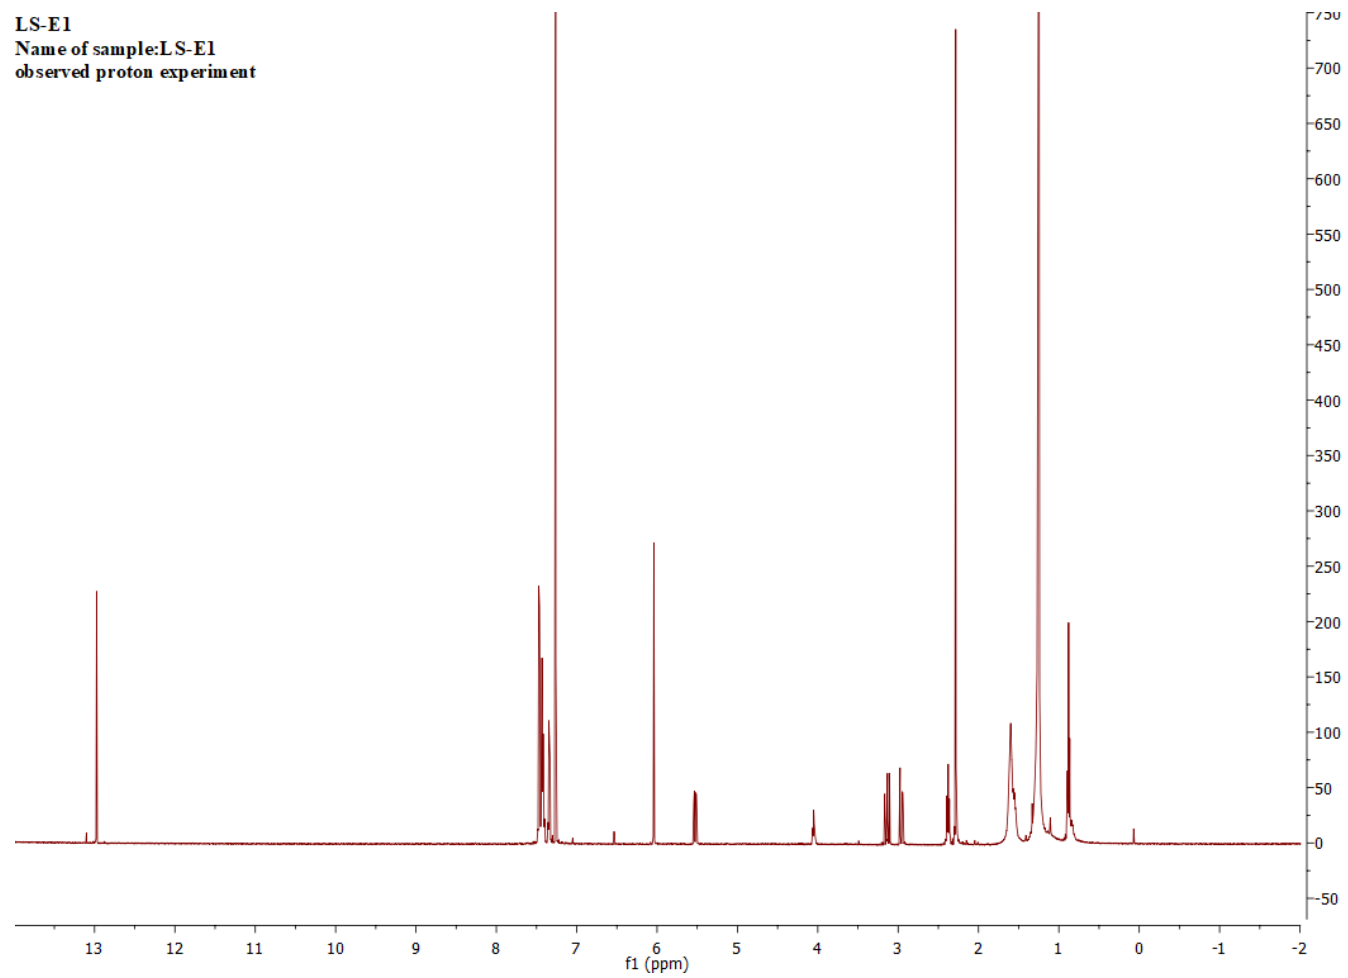

**Figure S11.** <sup>1</sup>H-NMR of interruptin C (500 MHz in CHCl<sub>3</sub>-*d*)

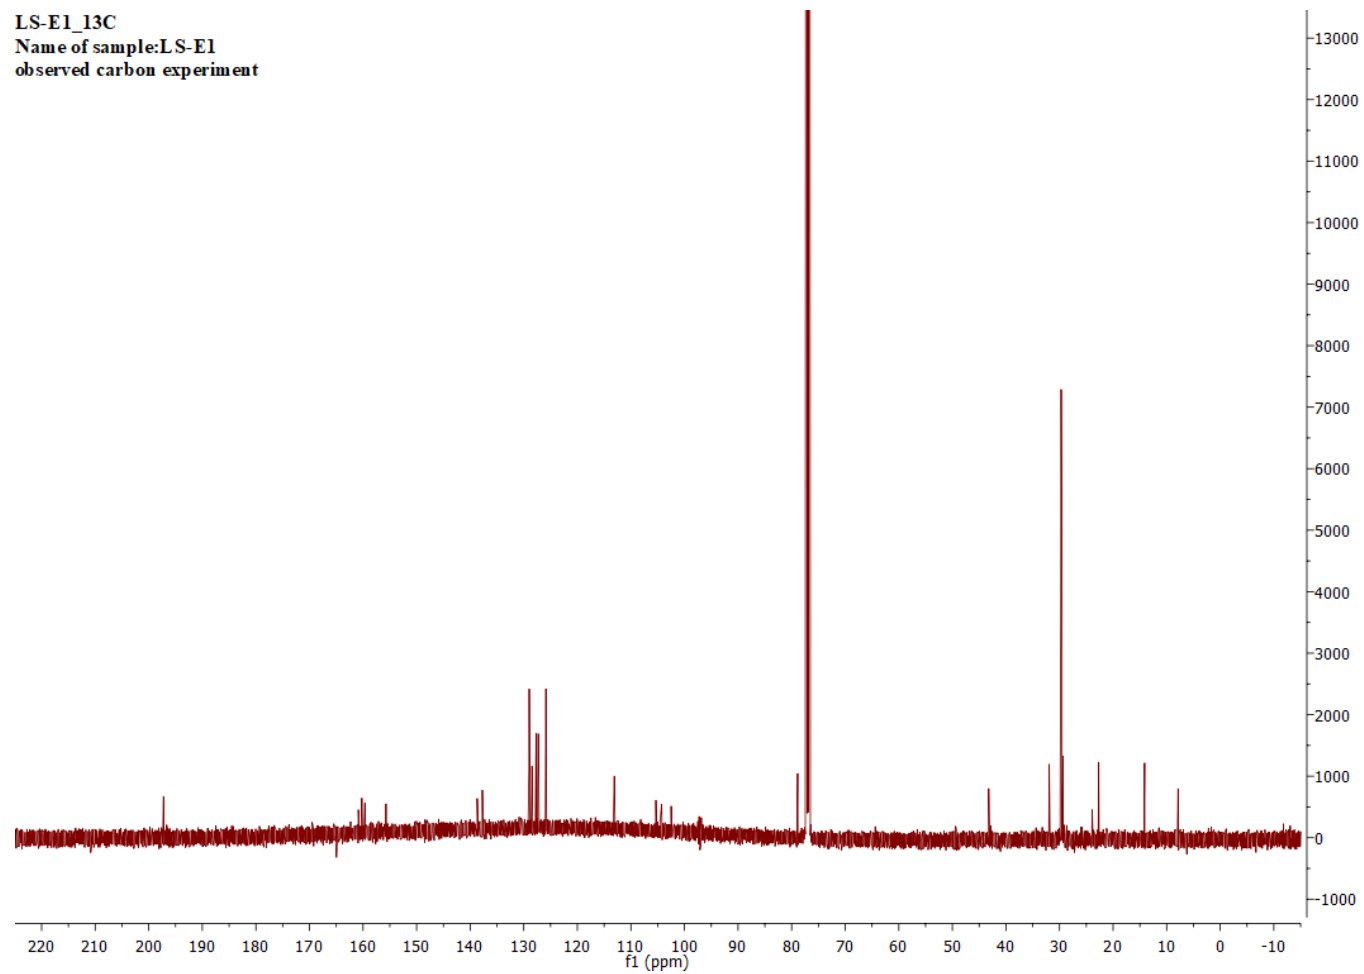

**Figure S12.**  $^{13}\text{C}$ -NMR of interruptin C (125 MHz in  $\text{CHCl}_3-d$ )

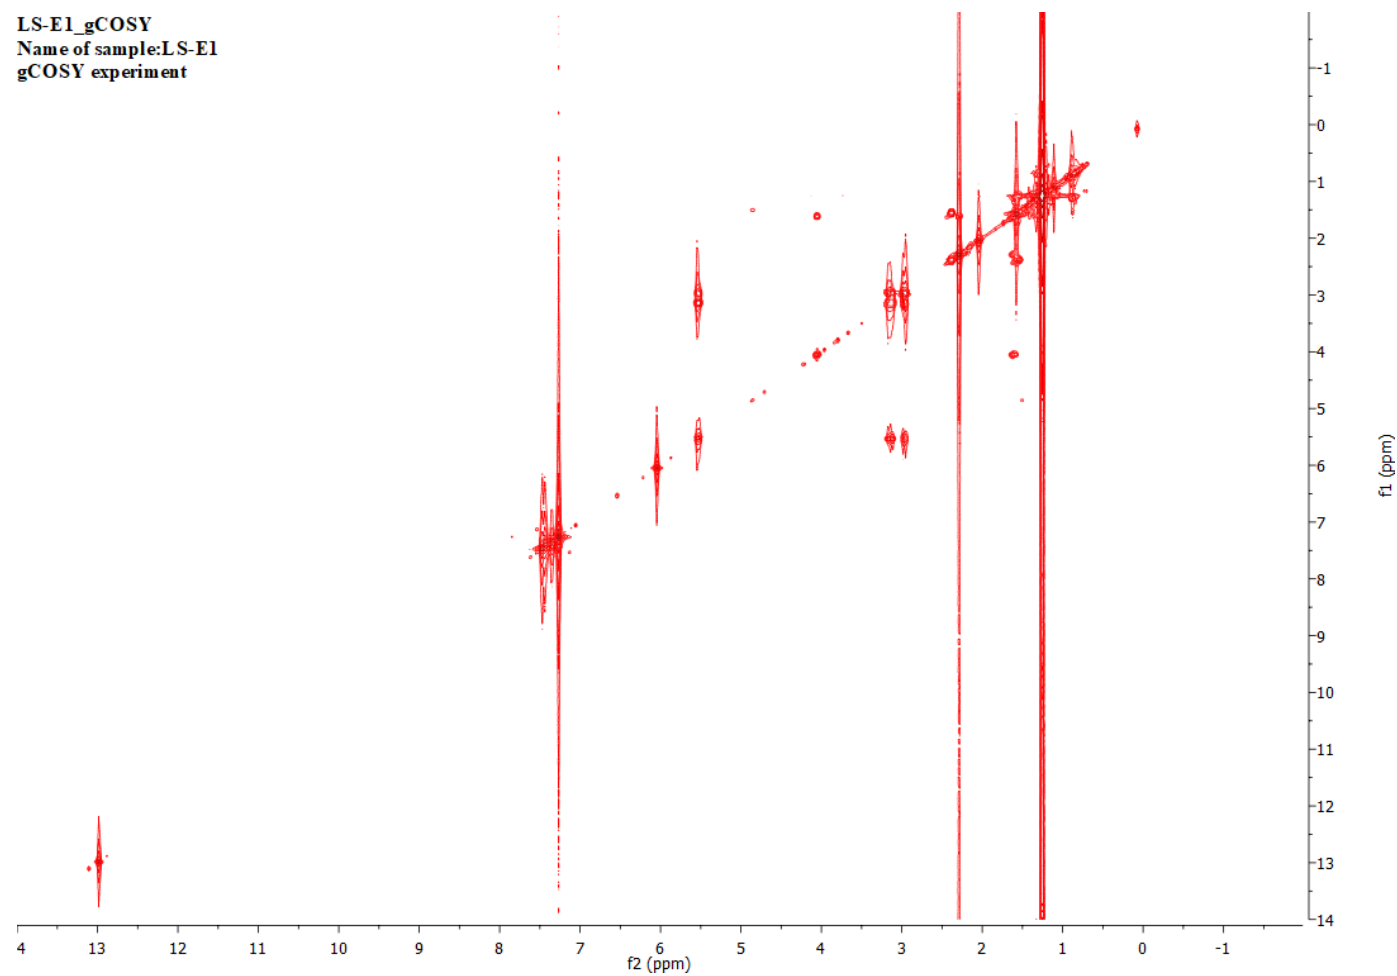

**Figure S13.**  $^1\text{H}$ - $^1\text{H}$  COSY of interruptin C

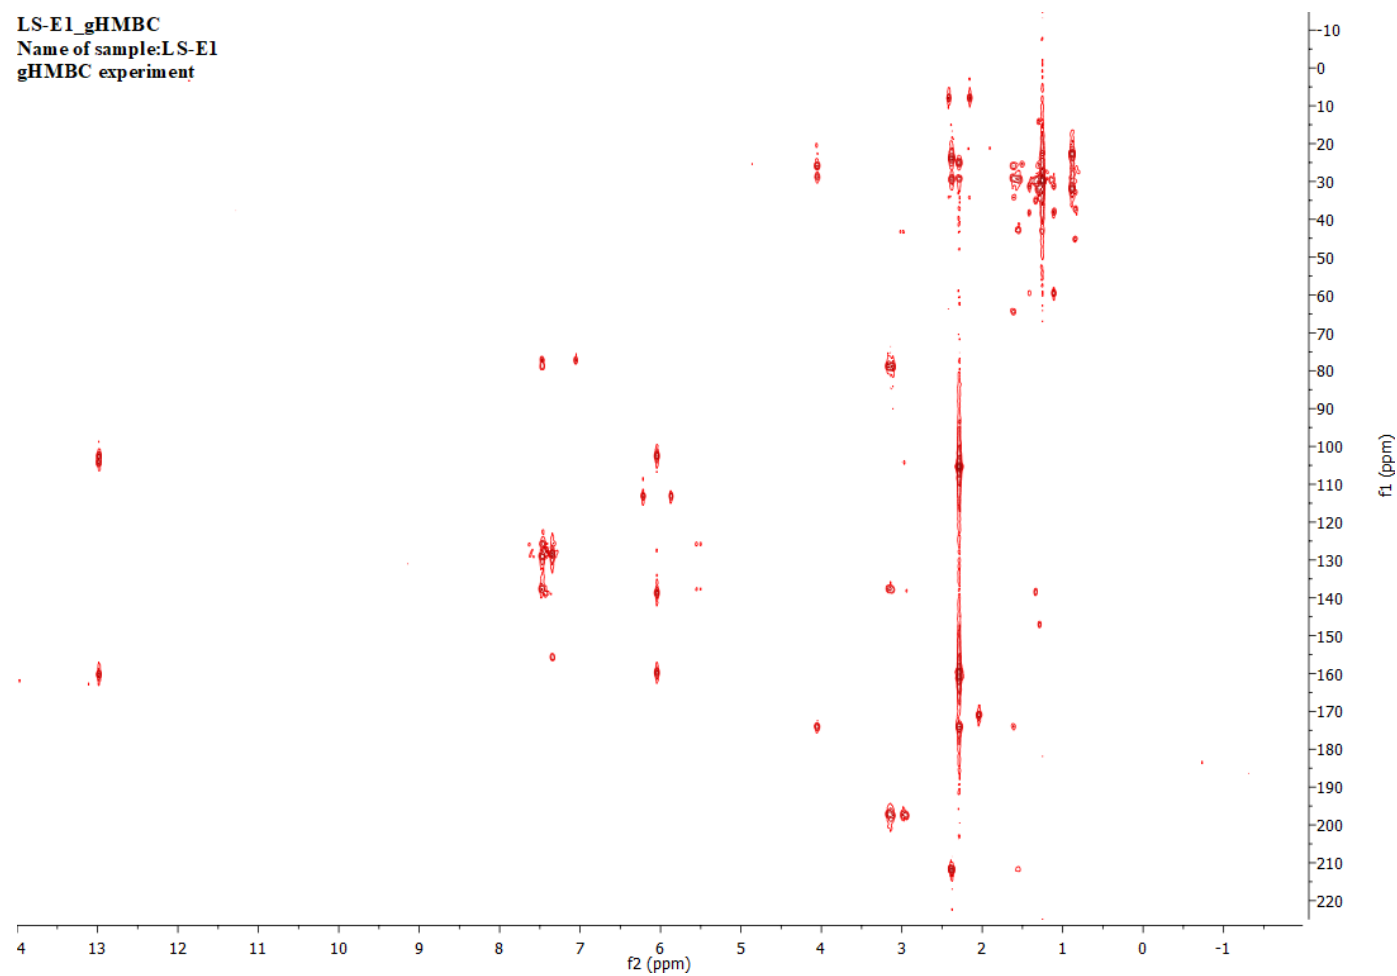

**Figure S14.** HMBC of interruptin C

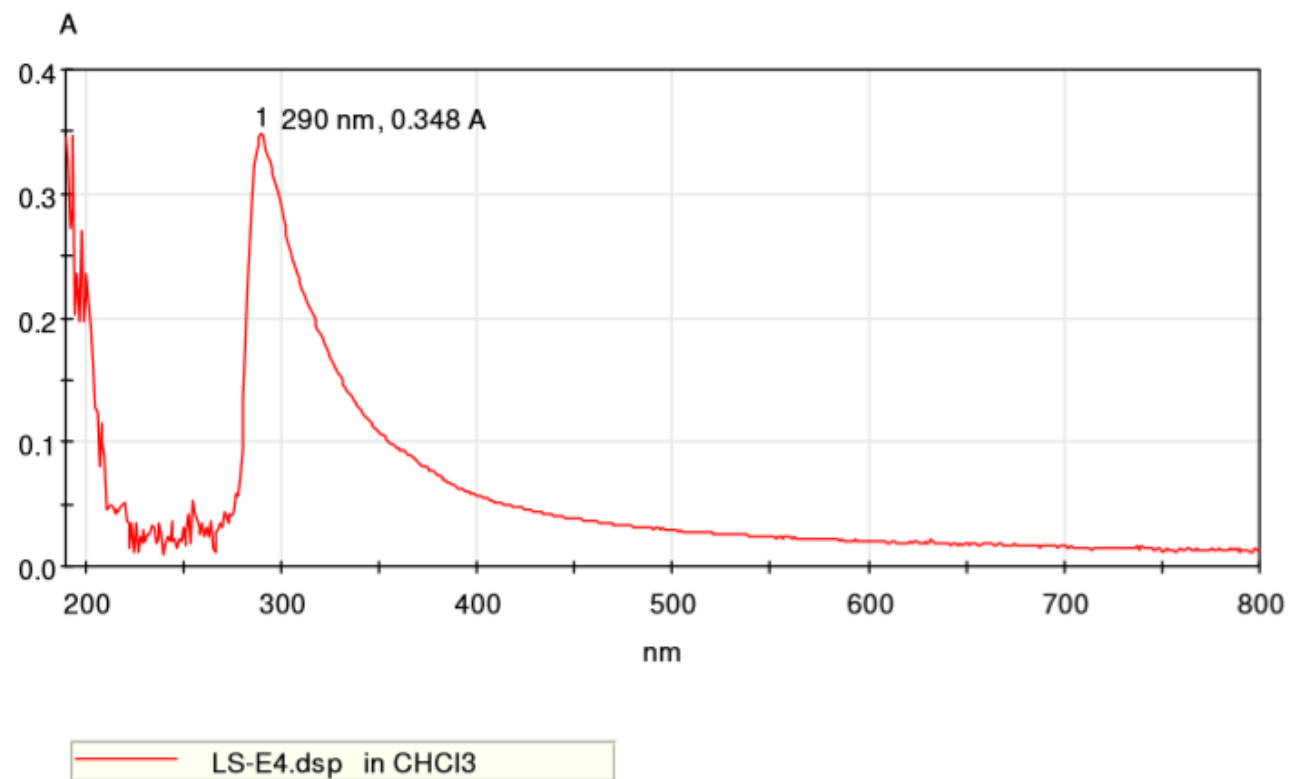

**Figure S15.** UV-Visible spectrum of ergosterol in chloroform

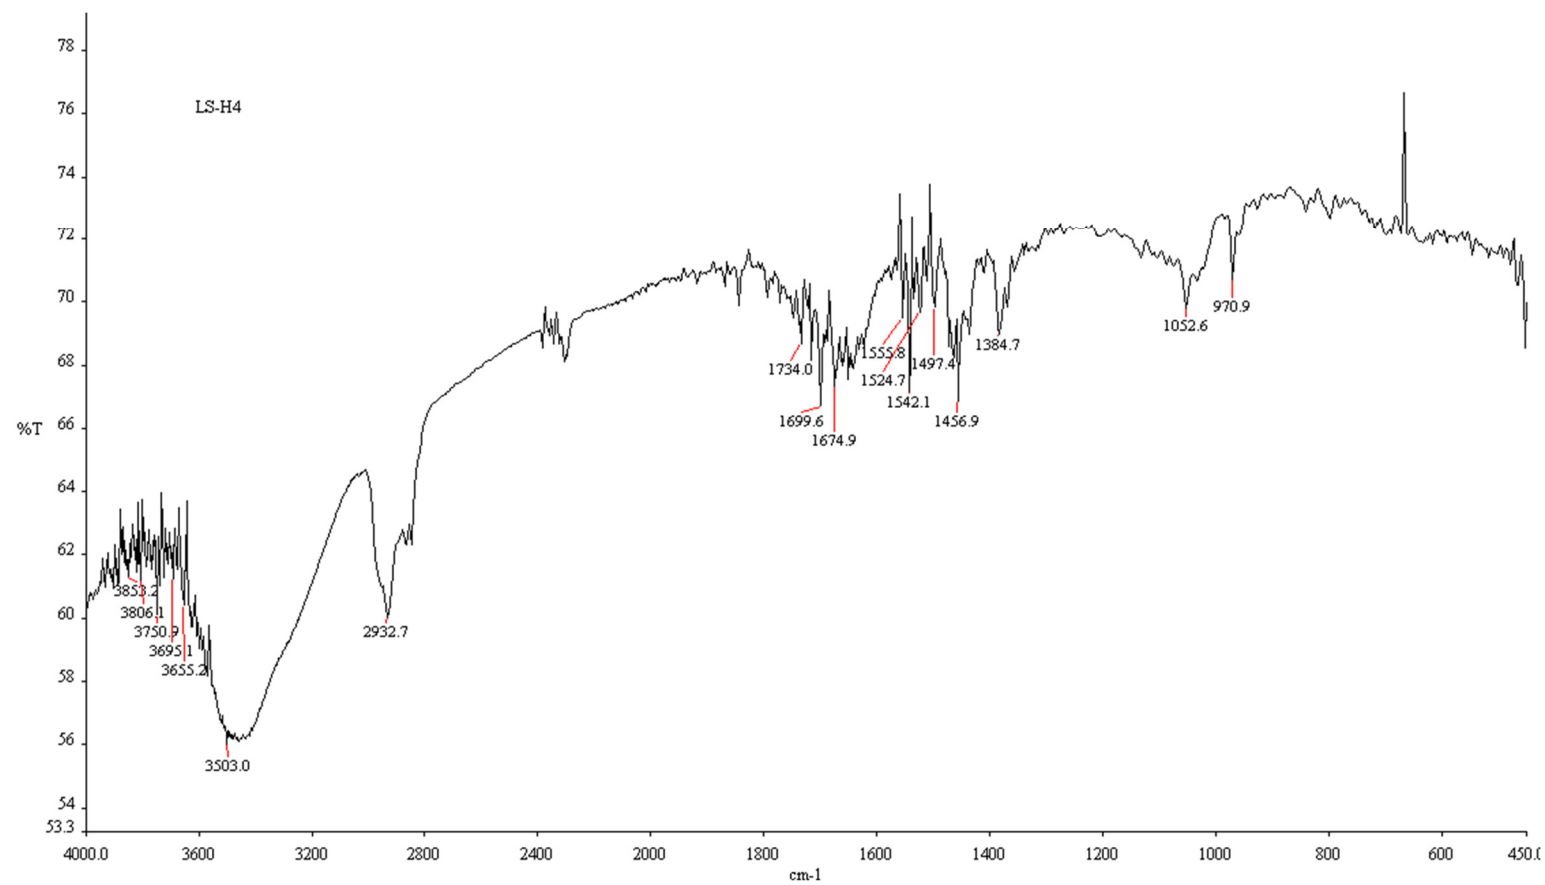

**Figure S16.** IR spectrum of ergosterol in KBr disc



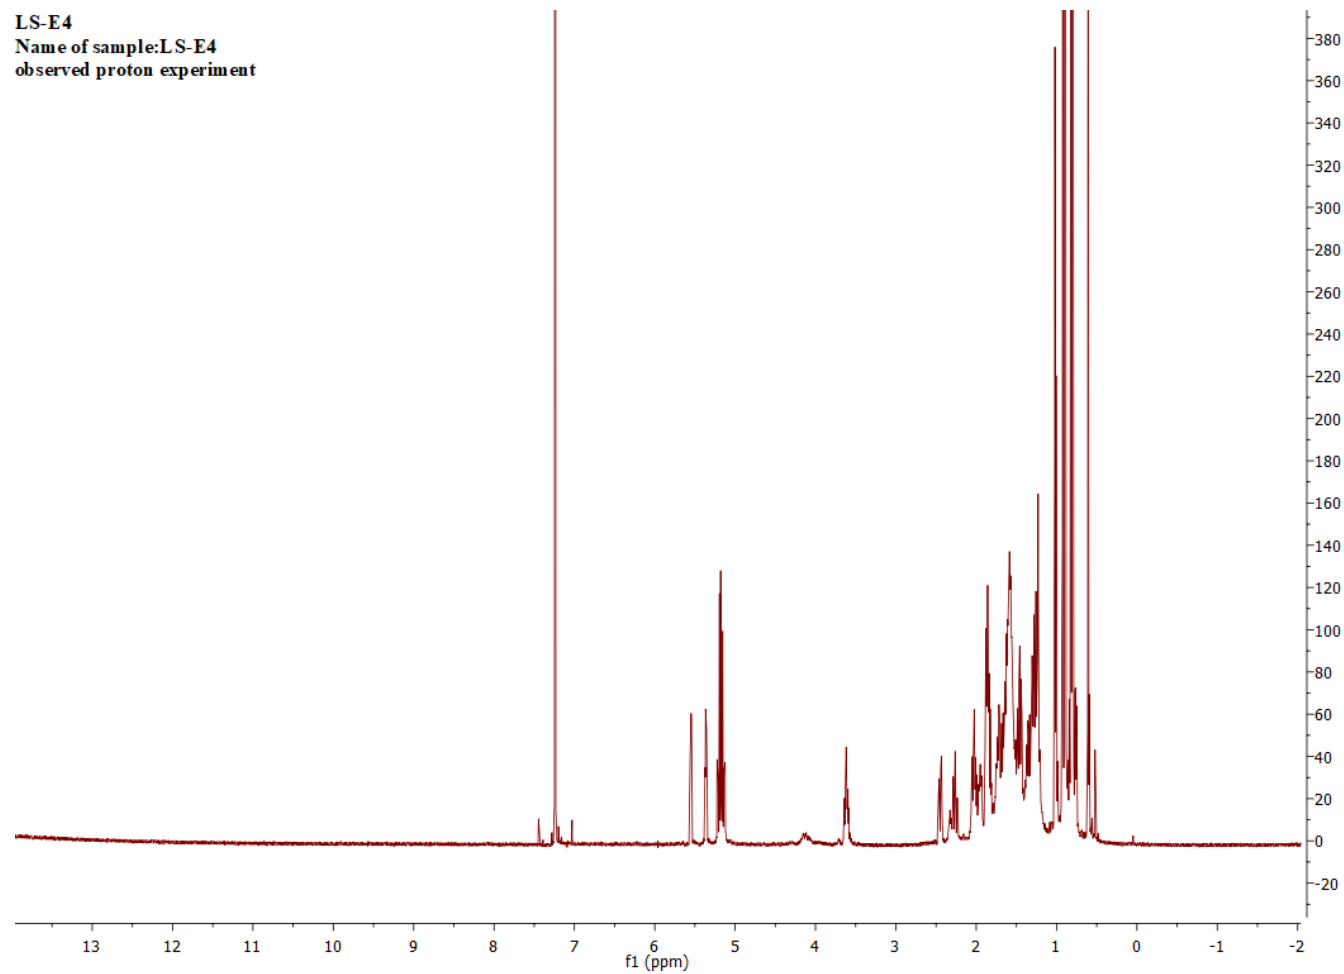

**Figure S17.**  $^1\text{H}$ -NMR of ergosterol (500 MHz in  $\text{CHCl}_3\text{-}d$ )

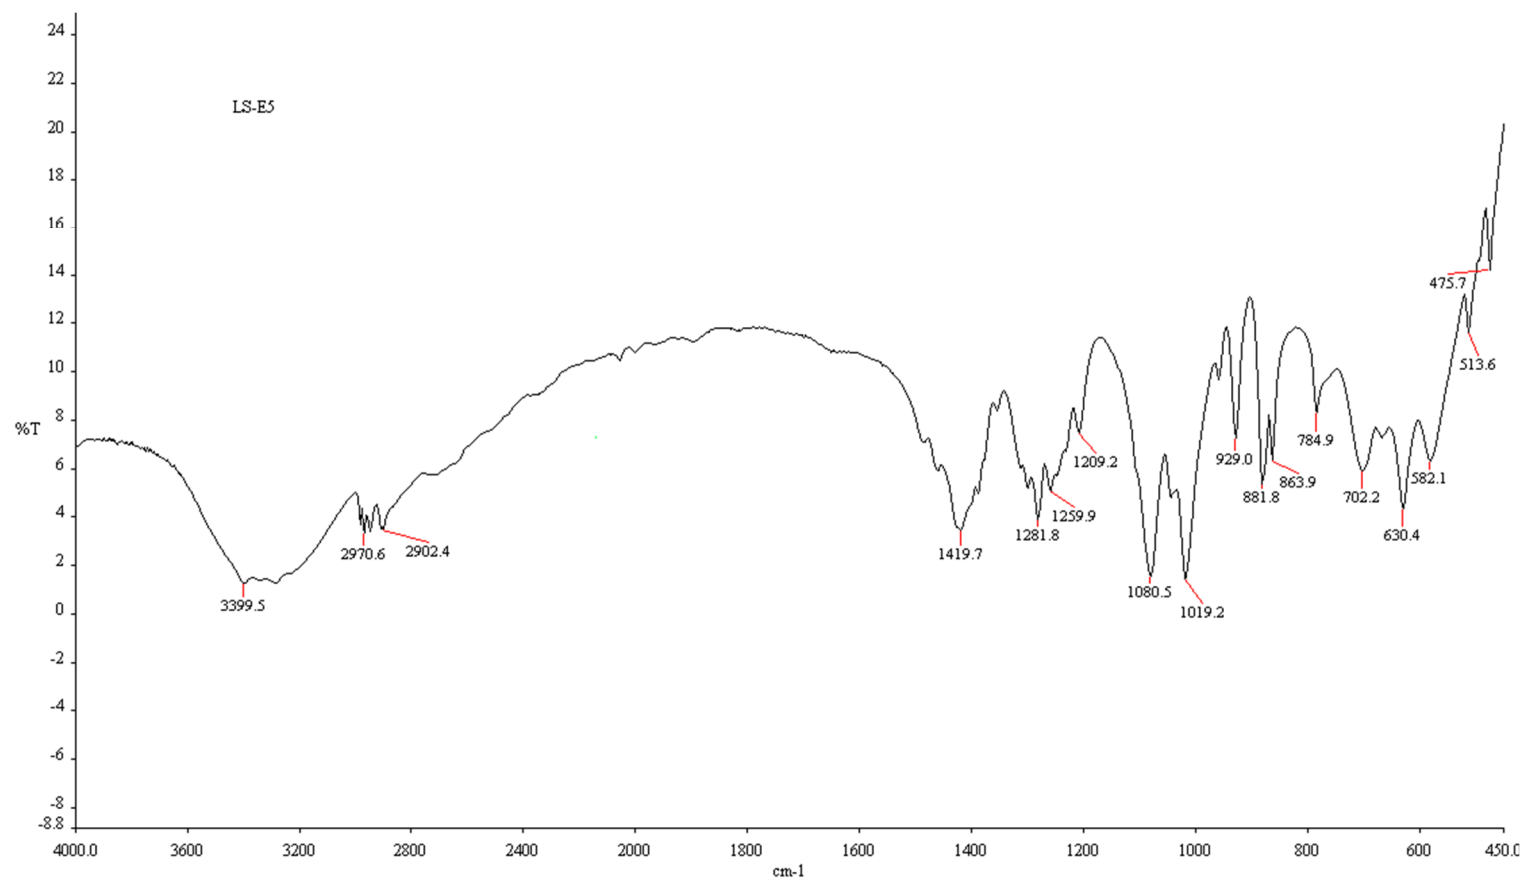

**Figure S18.** IR spectrum of diglycerol in KBr disc

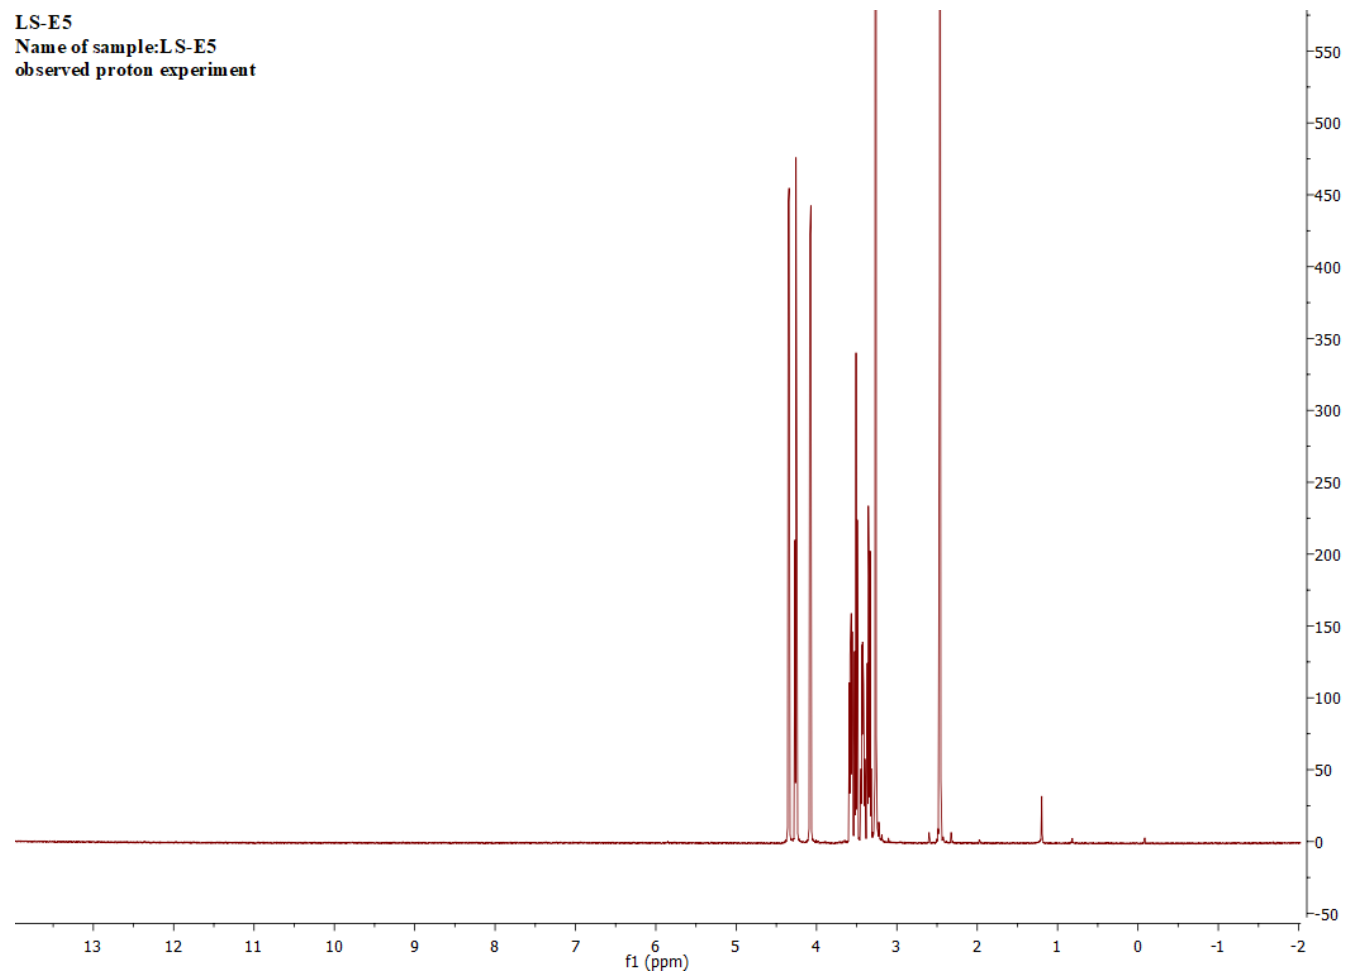

**Figure S19.**  $^1\text{H}$ -NMR of diglycerol (500 MHz in  $\text{DMSO}-d_6$ )

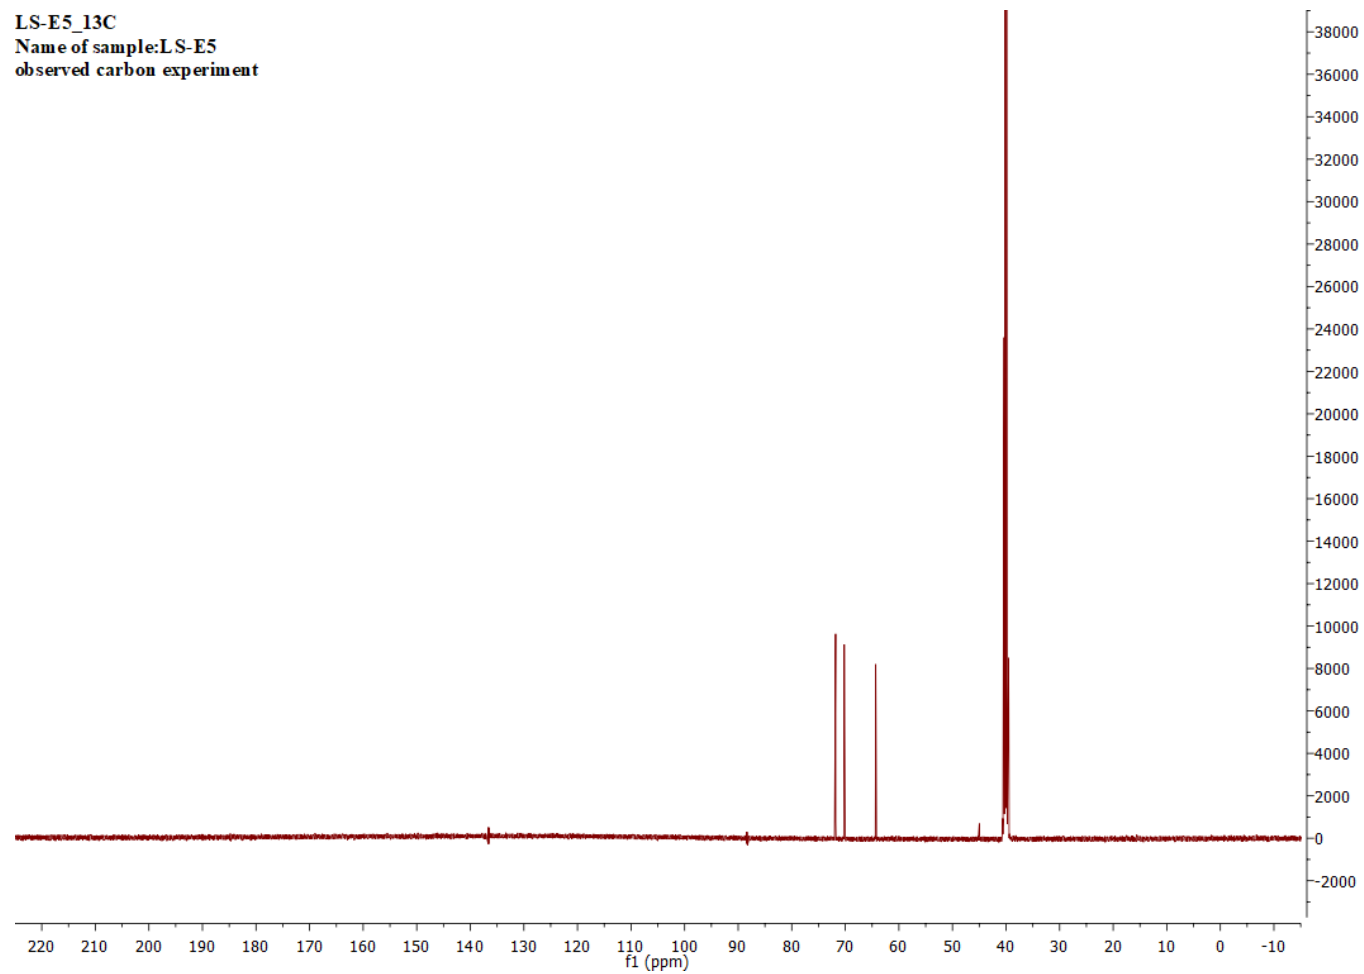

**Figure S20.**  $^{13}\text{C}$ -NMR of diglycerol (125 MHz in  $\text{DMSO}-d_6$ )

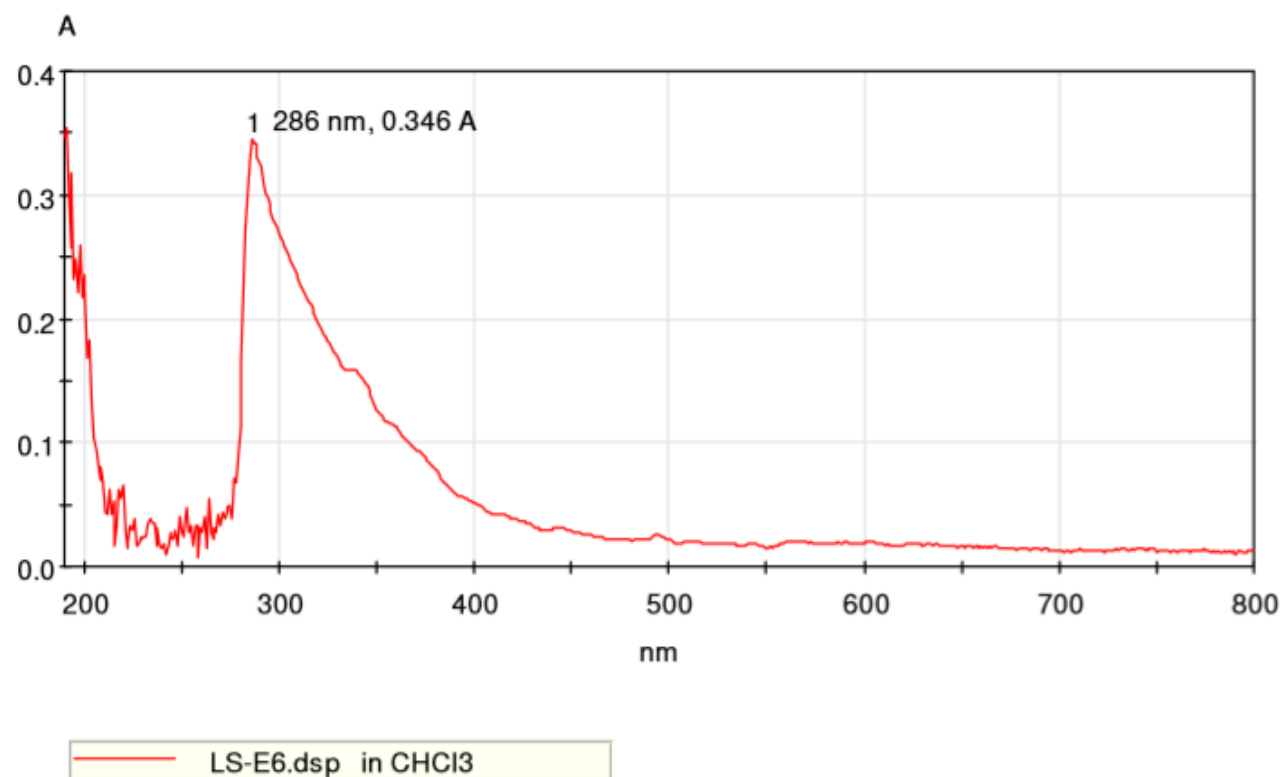

**Figure S21.** UV-Visible spectrum of the new diterpene in chloroform

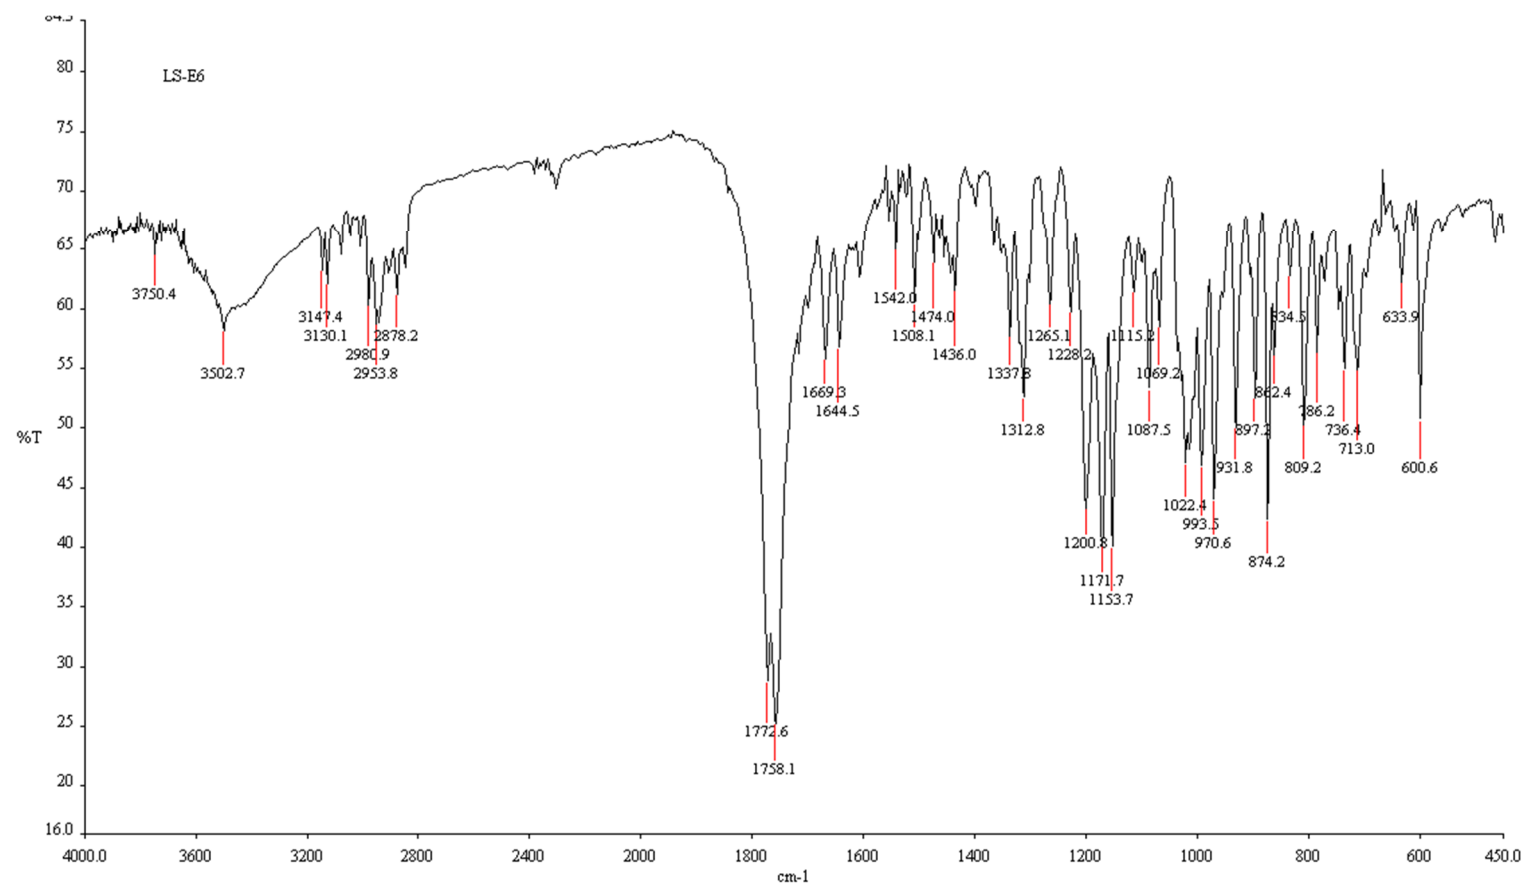

**Figure S22.** IR spectrum of the new diterpene in KBr disc

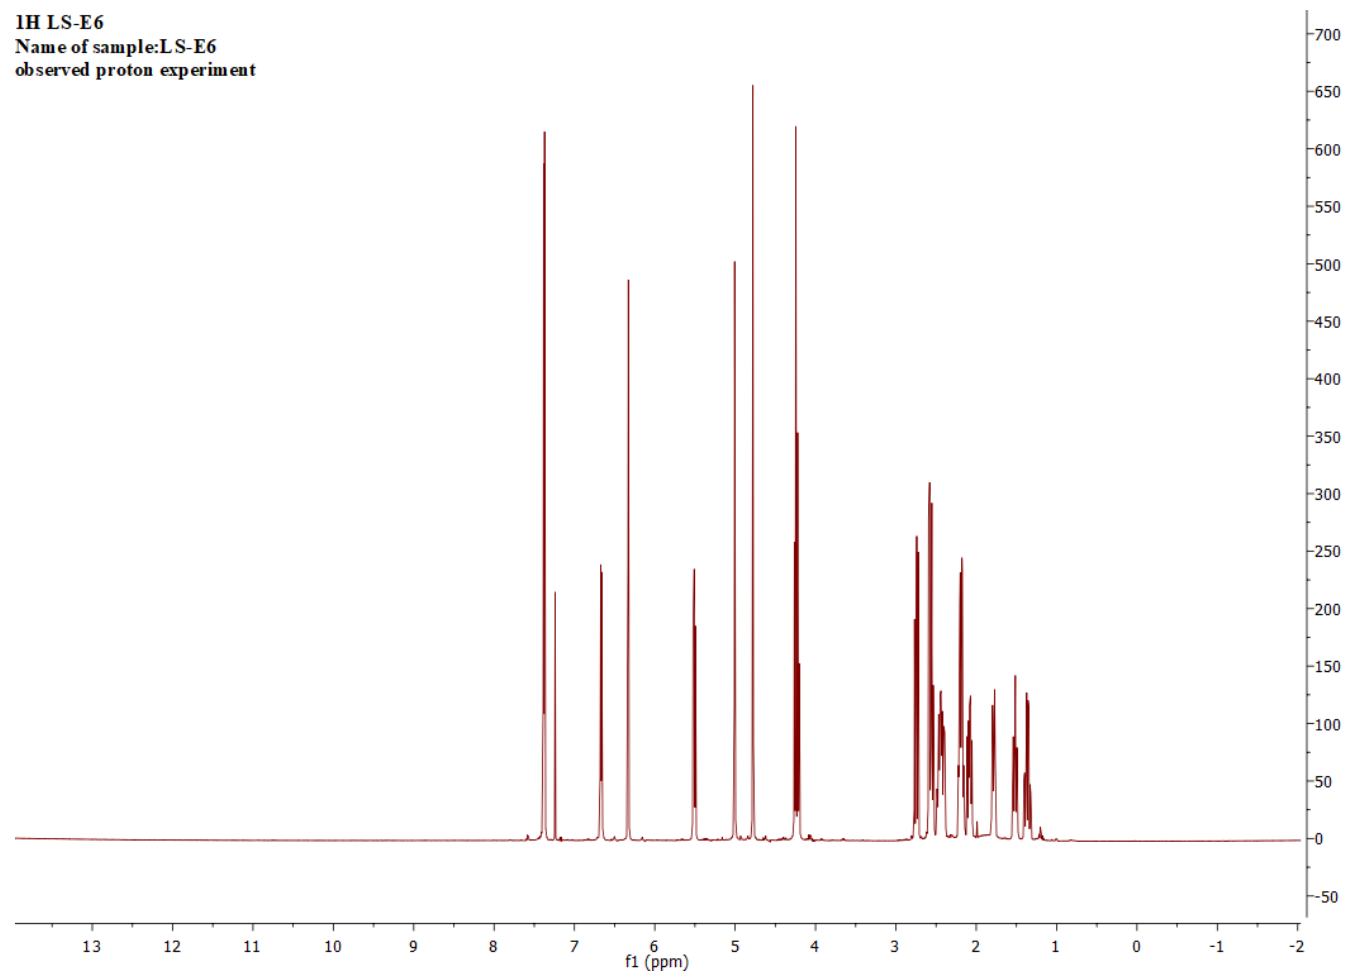

**Figure S23.** <sup>1</sup>H-NMR of the new diterpene (500 MHz in CHCl<sub>3</sub>-*d*)

LS-E6-Gcosy  
Name of sample:LS-E6  
Gcosy experiment

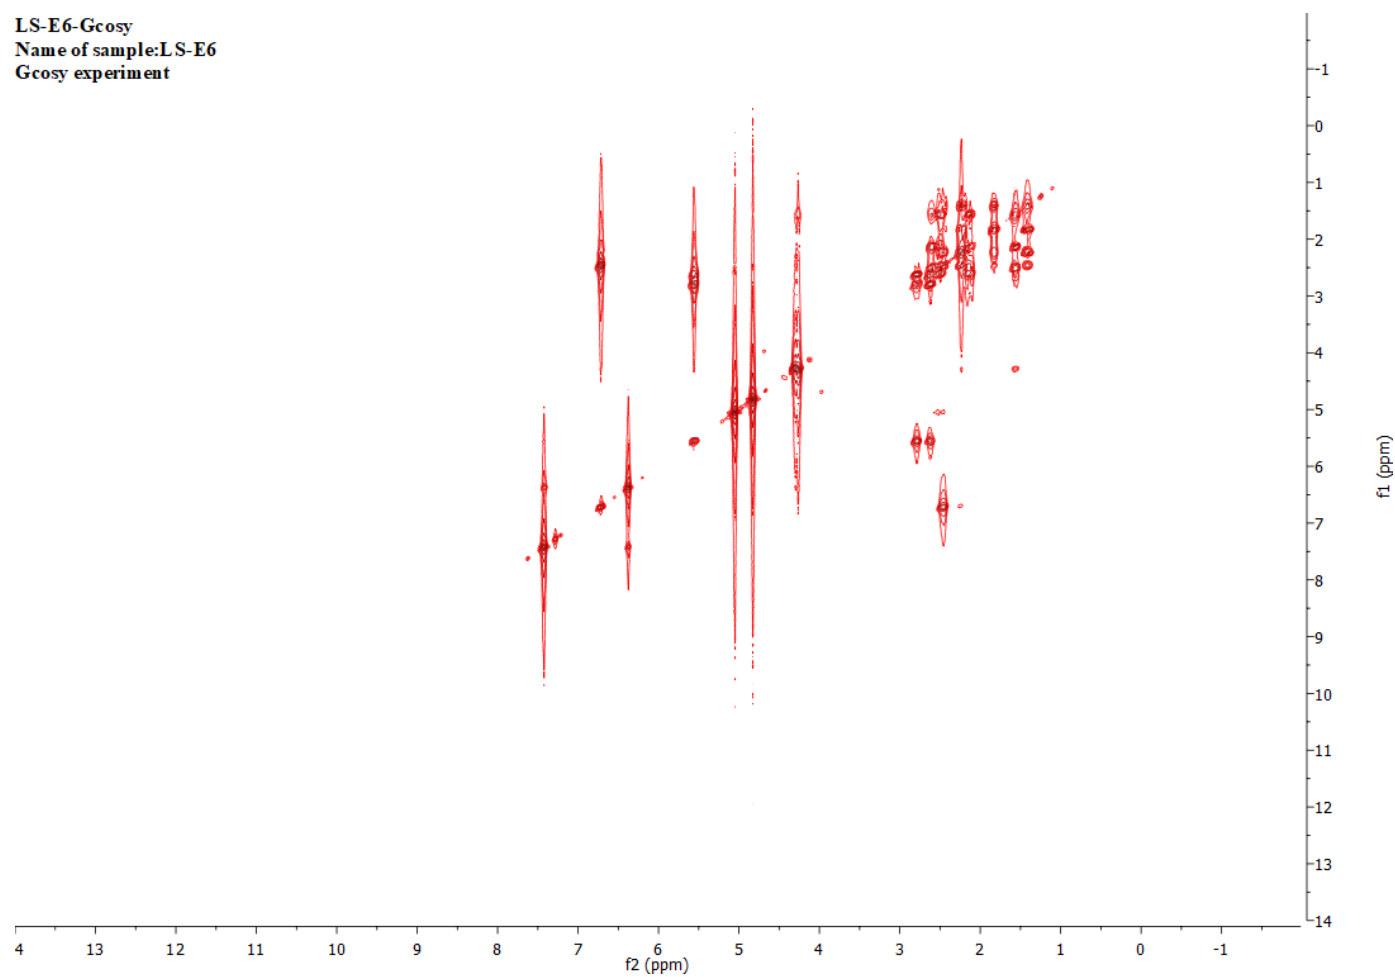

**Figure S24.**  $^1\text{H}$ - $^1\text{H}$  COSY of the new diterpene



LS-E6-13C  
Name of sample:LS-E6  
observed carbon experiment

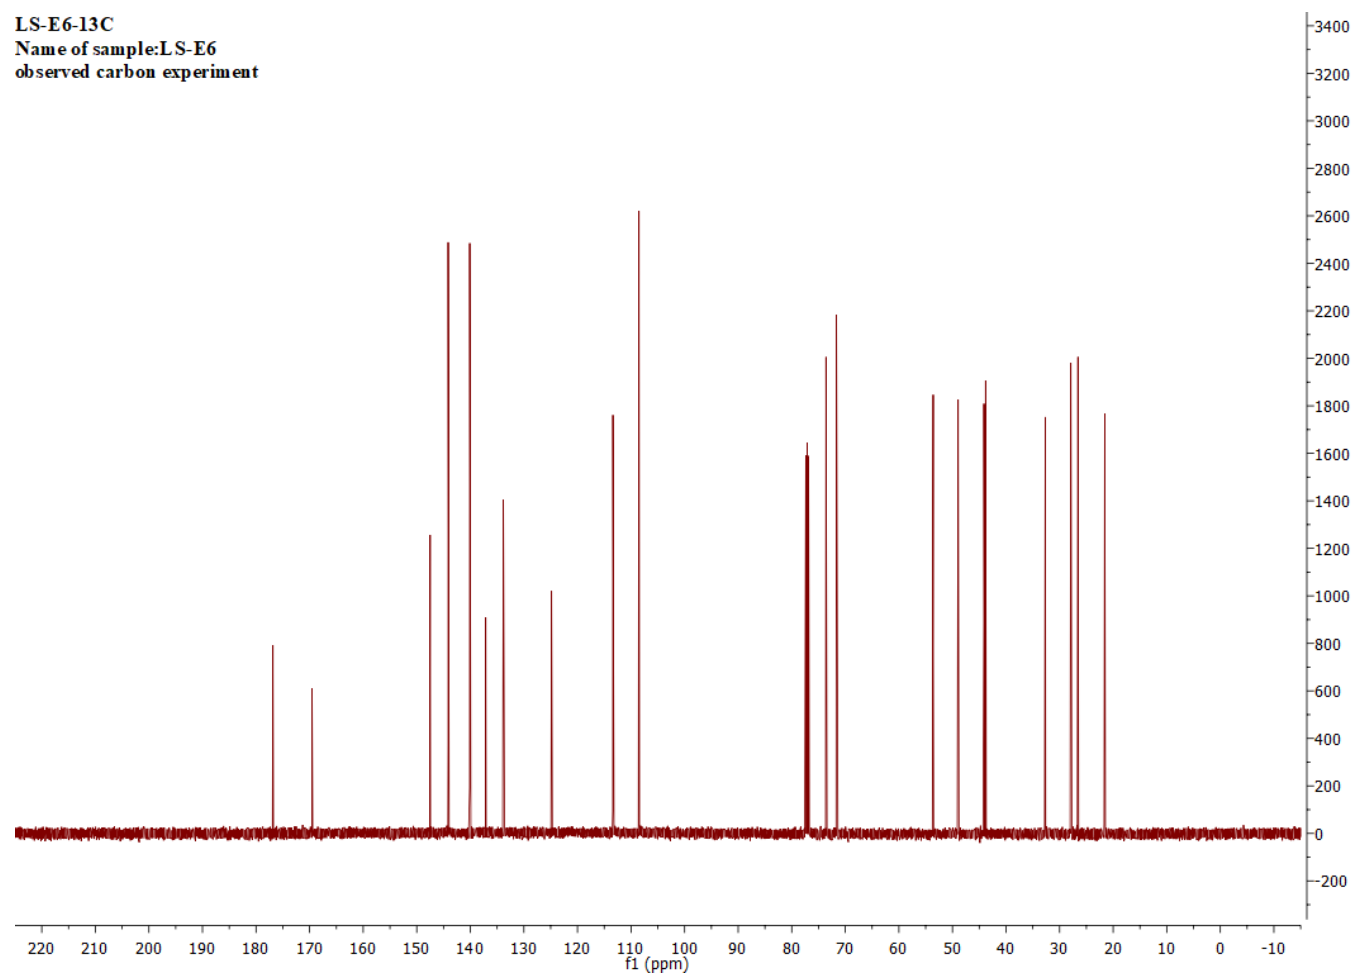

**Figure S25.**  $^{13}\text{C}$ -NMR of the new diterpene (125 MHz in  $\text{CHCl}_3$ - $d$ )

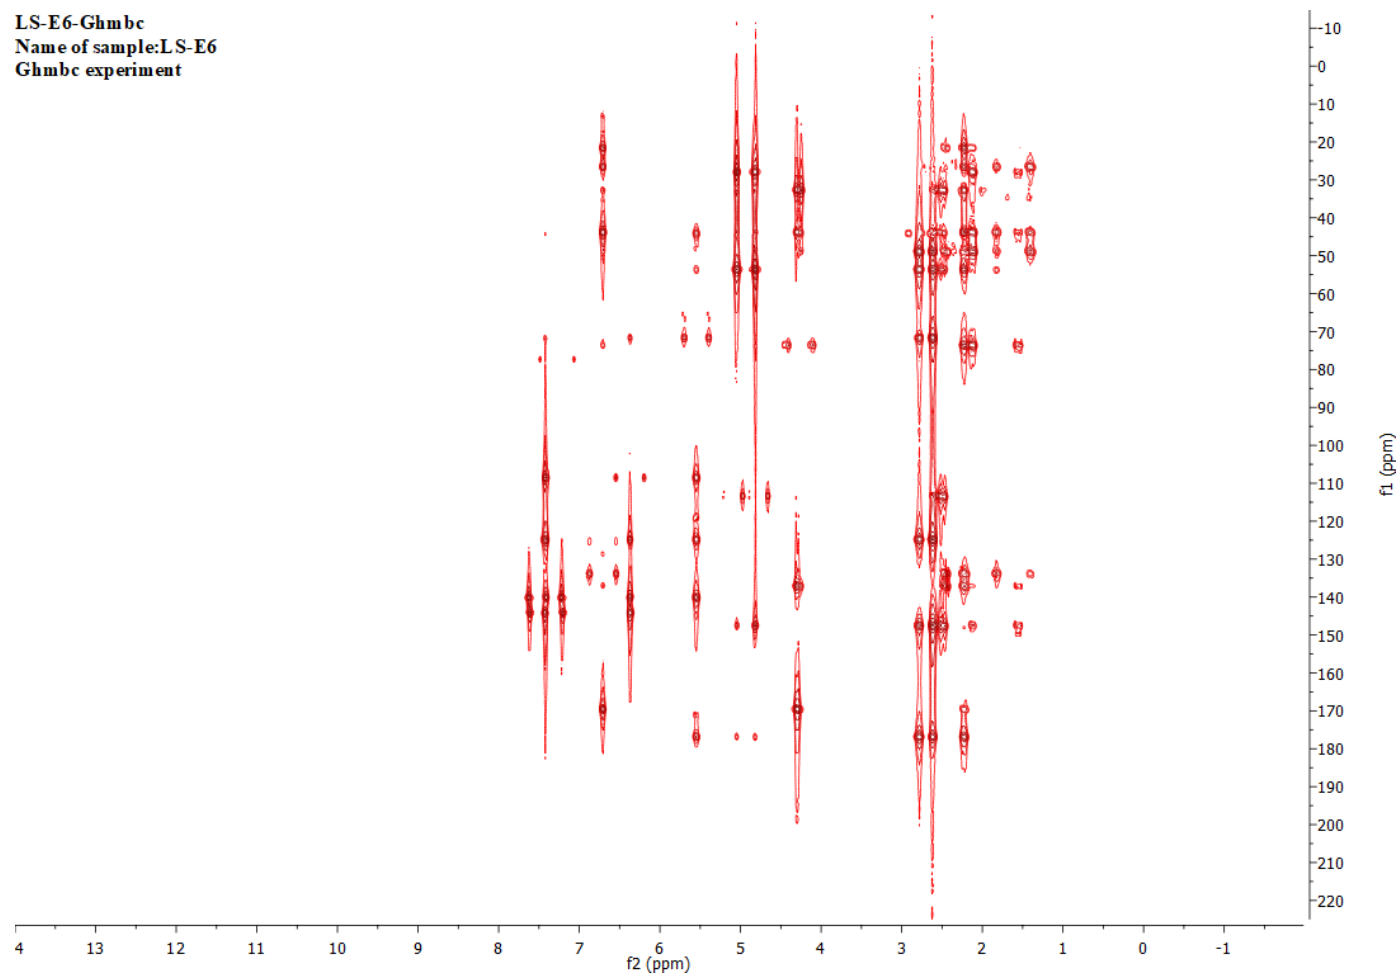

**Figure S26.** HMBC of the new diterpene

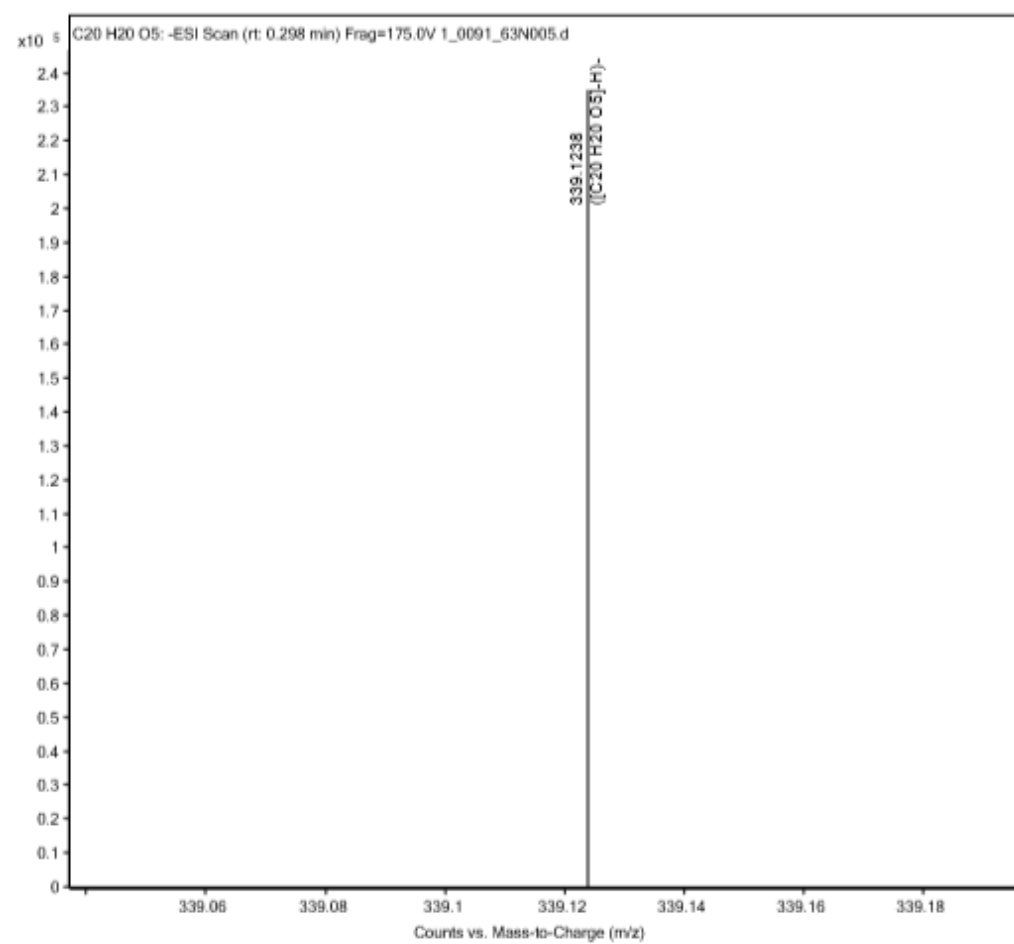

**Figure S27.** ESI-Mass spectrum from LC-MS/MS of the new diterpene

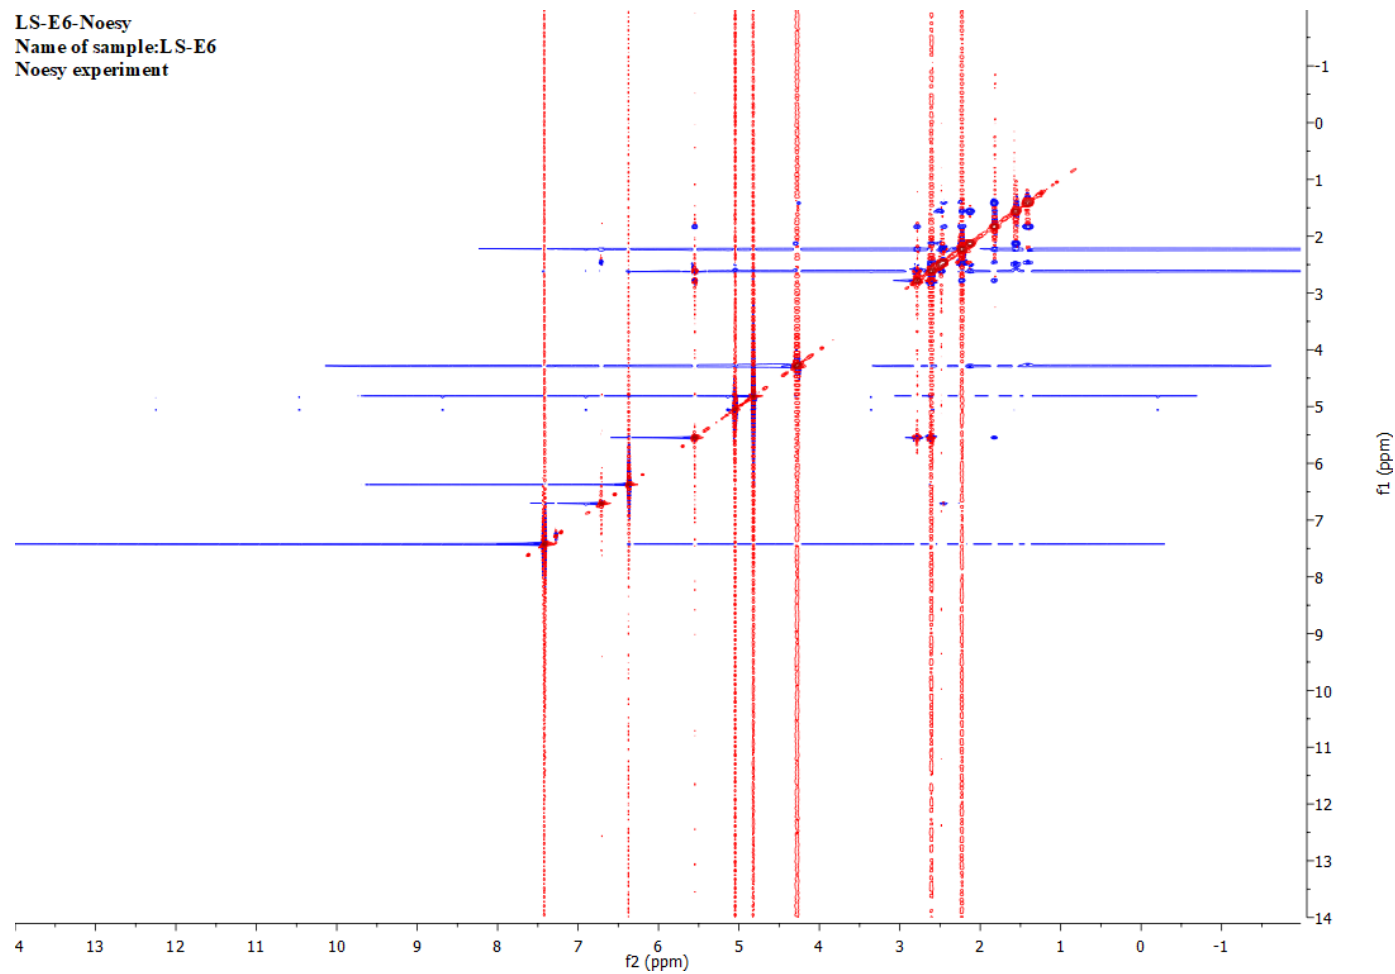

Figure S28. NOESY of the new diterpene
